# Supplementary material for: Cystatin A, a Potential Common Link for Mutant Myocilin Causative Glaucoma
Source: PLoS One. 2012 May 15;7(5):e36301. doi: 10.1371/journal.pone.0036301 (PMC3352898; doi:10.1371/journal.pone.0036301)
Supplement: Table S4 — K423E. The 100 most altered genes a) 50 upregulated; b) 50 downregulated (XLSX) [file pone.0036301.s004.xlsx]

## Sheet: Sheet1
Table S4. K423E. The 100 most altered genes
(a): 50 upregulated
Gene Name	Symbol	Entrez	Chromosome	FC	P-values
Potential ubiqutin ligase	HERC6	55008	4q22.1	15.4504	1.00313e-06
Interferon-induced protein 27	IFI27	3429	14q32	10.6132	1.83248e-05
Interferon-induced protein 44-like	IFI44L	10964	1p31.1	9.52919	0.000288874
Bone marrow stromal antigen 2	BST2	684	19p13.2	8.79507	1.85856e-05
Viperin	RSAD2	91543	2p25.2	7.89862	0.00021106
Myxovirus resistance 1	MX1	4599	21q22.3	7.67683	1.05761e-06
2',5'-Oligoadenylate synthetase 1	OAS1	4938	12q24.1	7.39118	0.00116287
Interferon-induced with helicase C domain	IFIH1	64135	2q24	6.43729	0.000171231
Cytidine monophosphate kinase 2	CMPK2	129607	2p25.2	6.43512	0.00469153
Interferon-induced protein 6	IFI6	2537	1p35	6.3336	0.00347131
Interferon-induced protein 56	IFIT1	3434	10q25-q26	5.81186	7.92564e-05
XIAP associated factor 1	XAF1	54739	17p13.2	5.15178	0.00495635
Dead box protein 60	DDX60	55601	4q32.3	5.07535	0.000936457
2'-5'-Oligoadenylate synthetase 2	OAS2	4939	12q24.2	4.71906	0.000197019
Ubiquitin ligase protein MIB1	MIB1	57534	18q11.2	4.56868	0.0351884
Ubiquitin-like protein ISG15	ISG15	9636	1p36.33	4.22314	0.00490479
2'-5'-Oligoadenylate synthetase 3	OAS3	4940	12q24.2	4.01994	4.30824e-05
5-Hydroxytryptamine receptor 2B	HTR2B	3357	2q36.3-q37.1	3.99281	0.0448151
Insulin-like growth factor 1	IGF1	3479	12q22-q23	3.90946	0.0410133
Potassium channel, T2	KCNT2	343450	1q31.3	3.85572	0.0374465
Protein tyrosine phosphatase receptor	PTPRG	5793	3p21-p14	3.77259	0.0142442
Transcription factor	STAT1	6772	2q32.2	3.75457	0.00066401
Zinc finger, CCHC domain-containing 7	ZCCHC7	84186	9p13.2	3.58765	0.0257945
Muscleblind-like protein 1	MBNL1	4154	3q25	3.31033	0.0317096
Zinc finger and BTB domain containing 20	ZBTB20	26137	3q13.2	3.25684	0.0223365
Epithelial stromal interaction protein 1	EPSTI1	94240	13q13.3	3.24157	0.0012811
Interferon regulatory factor 7	IRF7	3665	11p15.5	3.22097	2.02154e-05
Ubiquitin-conjugating enzyme E2D 3	UBE2D3	7323	4q24	3.21081	0.0293634
Interferon-induced transmembrane 1	IFITM1	8519	11p15.5	3.1995	0.00166999
Poly (ADP-ribose) polymerase 9	PARP9	83666	3q21	3.1731	0.0139854
Tripartite motif-containing 14	TRIM14	9830	9q22.33	3.17065	0.000147926
Deltex 3-like	DTX3L	151636	3q21.1	3.08948	0.00383198
Myocilin	MYOC	4653	1q23-q24	3.08427	0.0162597
G1 to S phase transition 1	GSPT1	2935	16p13.1	3.03197	0.0205557
Interferon-induced protein 35	IFI35	3430	17q21	3.00905	0.00529256
Myxovirus resistance 2	MX2	4600	21q22.3	2.98992	0.00021941
Retinoic acid-binding receptor beta	RORB	6096	9q22	2.98897	0.0198752
Nuclear autoantigenic sperm protein	NASP	4678	1p34.1	2.98033	0.0154249
Transcription factor 12	TCF12	6938	15q21	2.93179	0.0266243
Ring finger protein 213	RNF213	57674	17q25.3	2.92228	0.000929007
Multiple C2 domains, transmemb2	MCTP2	55784	15q26.2	2.9	0.0205031
Interferon-induced 60kDa protein	IFIT3	3437	10q24	2.84513	5.60457e-05
Interferon-induced protein 44	IFI44	10561	1p31.1	2.8312	0.000272569
Monocyte protein 5	MOP-5	25939	20pter-q12	2.80318	0.00161609
Pro-melanin-concentrating hormone	PMCH	5367	12q23-q24	2.80009	0.029898
Alpha-2 actin	ACTA2	59	10q23.3	2.79036	0.0112355
Vacuolar protein sorting 13 homolog C	VPS13C	54832	15q22.2	2.74327	0.0110061
Integrin alpha 9	ITGA9	3680	3p21.3	2.70075	0.0498795
Phosphoinositide-3-kinase-C2-alpha	PIK3C2A	5286	11p15.5-p14	2.70027	0.0413699
Ubiquitin specific peptidase 18	USP18	11274	22q11.21	2.65508	0.000248625
(b): 50 downregulated
Gene Name	Symbol	Entrez	Chromosome	FC	P-value
Tumor necrosis factor receptor superfamily 10D	TNFRSF10D	8793	8p21	-5.35738	0.00828076
Catenin alpha 1	CTNNA1	1495	5q31	-4.90749	0.0144105
KIT ligand	KITLG	4254	12q22	-4.85891	0.00560176
Protein tyrosine phosphatase G1	PTPN12	5782	7q11.23	-4.24845	0.0266363
Twinfilin, actin-binding protein	TWF1	5756	12q12	-4.22762	0.0077145
Protein kinase C inhibitor protein 1	YWHAE	7531	17p13.3	-4.1807	0.0224911
Dimethylarginine dimethylaminohydrolase 1	DDAH1	23576	1p22	-3.80969	0.026853
WD repeat-containing protein 1	WDR1	9948	4p16.1	-3.6397	0.022127
Stress-induced-phosphoprotein 1	STIP1	10963	11q13	-3.58854	0.00835785
BCL2-like protein 3	MCL1	4170	1q21	-3.53282	0.0155568
Skeletal muscle LiM-protein 1	FHL1	2273	Xq26	-3.43336	0.00510016
Thrombin receptor-like 2	F2RL2	2151	5q13	-3.37519	0.0118595
Anaphase promoting complex 5	ANAPC5	51433	12q24.31	-3.20713	0.00916361
Prostaglandin E receptor 3	PTGER3	5733	1p31.2	-3.20281	0.0455226
Potassium channel K2	KCNK2	3776	1q41	-3.16469	0.0277446
Regulator of G-protein signaling 4	RGS4	5999	1q23.3	-3.13191	0.0152973
Putative homeodomain transcription factor 2	PHTF2	57157	7q11.23-q21	-3.11698	0.0034418
Junctional adhesion molecule 3	JAM3	83700	11q25	-3.02325	0.0215222
Heterogeneous nuclear ribonucleoprotein H	HNRNPH1	3187	5q35.3	-2.98758	0.0200069
Cydin-dependent kinase 17	CDK17	5128	12q23.1	-2.97084	0.00913765
Ring finger protein 6	RNF6	6049	13q12.2	-2.95915	0.0326496
DnaJ (Hsp40) homolog B4	DNAJB4	11080	1p31.1	-2.94696	0.00683607
BCL2-like 1	BCL2L1	598	20q11.21	-2.93156	0.0124342
Transient receptor potential cation channel	TRPV2	51393	17p11.2	-2.92878	0.0172734
Lectin, mannose-binding 1	LMAN1	3998	18q21.3-q22	-2.91436	0.0175738
Cyclin-dependent kinase 2	CDK2	1017	12q13	-2.8745	0.043293
F-box protein Skp-2	SKP2	6502	5p13	-2.85674	0.0153378
Solute carrier 4	SLC4A4	8671	4q21	-2.84039	0.0224517
Syntaxin 16	STX16	8675	20q13.32	-2.83148	0.0134212
Supressor of cytokine signaling	C1S	716	12p13	-2.8273	0.0416491
Heat shock 70KDa protein 4	HSPA4	3308	5q31.1-q31.2	-2.82629	0.0136043
Exocyst complex component 5	EXOC5	10640	14q23.1	-2.80715	0.00528591
Ras-related protein Rab-5A	RAB5A	5868	3p24-p22	-2.75971	0.00738371
NCK-associated protein 1	NCKAP1	10787	2q32	-2.75413	0.00534959
Vacuolar protein sorting 35	VPS35	55737	16q12	-2.75216	0.0170075
Lysyl oxidase	LOX	4015	5q23.2	-2.75135	0.0305223
Protein kinase C substrate	MARCKS	4082	6q22.2	-2.72916	0.0359869
Fumarate hydratase	FH	2271	1q42.1	-2.72548	0.0099039
Monocarboxylate transporter 1	MCTI	6566	1p12	-2.7181	0.039065
Docking protein alpha	SRPR	6734	11q24.3	-2.71567	0.0359998
Ribonucleotide reductase M1	RRM1	6240	11p15.5	-2.71026	0.0116666
Death-associated protein kinase 3	DAPK3	1613	19p13.3	-2.70849	0.016337
Cytochrome P450 1B1	CYP1B1	1545	2p21	-2.7063	0.0271665
F-box protein Fbw1b	FBXW11	23291	5q35.1	-2.68299	0.00411177
Calmodulin 1	CALM1	801	14q24-q31	-2.68019	0.0280778
Ras-related protein Rab-35	RAB35	11021	12q24.31	-2.67725	0.0178796
SM-11044 binding protein	TM9SF3	56889	10q24.1	-2.6709	0.0344438
RNA polymerase II-associated protein 3	RPAP3	79657	12q13.11	-2.66547	0.00943568
Gelsolin	GSN	2934	9q33	-2.65403	0.0178518
Glutaminase	GLS	2744	2q32-q34	-2.63916	0.0168974
